# Supplementary material
Source: PubMed Central journal article supplement (PMC5438776)
Supplement: NIHMS845336-supplement.pdf [file NIHMS845336-supplement.pdf]

**Appendix**  
**Factors Related to Pre-exposure Prophylaxis Prescription by U.S. Primary Care Physicians**  
**Walsh and Petroll**

**Appendix Table 1.** Items Assessing Primary Care Physicians' PrEP Knowledge

| <b>Information: PrEP knowledge</b> (correct answer in <b>bold</b> )                                                                                                                                                                                                                                                                                                                                                                                                                                                                                                                                                                                                  | <b>% correct</b> | <b>Factor loading</b> |
|----------------------------------------------------------------------------------------------------------------------------------------------------------------------------------------------------------------------------------------------------------------------------------------------------------------------------------------------------------------------------------------------------------------------------------------------------------------------------------------------------------------------------------------------------------------------------------------------------------------------------------------------------------------------|------------------|-----------------------|
| 1. According to current guidance, is HIV antibody testing suggested prior to initiating PrEP in a patient who is not experiencing any symptoms? <ul style="list-style-type: none"> <li>• <b>Yes</b></li> <li>• No</li> <li>• Don't know</li> </ul>                                                                                                                                                                                                                                                                                                                                                                                                                   | 85%              | 0.66                  |
| 2. How many antiretroviral medications are in the regimen that is FDA-approved for PrEP? <ul style="list-style-type: none"> <li>• 1</li> <li>• <b>2</b></li> <li>• 3</li> <li>• 4</li> <li>• Not sure/don't know</li> </ul>                                                                                                                                                                                                                                                                                                                                                                                                                                          | 60%              | 0.67                  |
| 3. Which antiretroviral medication(s) are FDA-approved for PrEP? (choose all that apply) <sup>a</sup> <ul style="list-style-type: none"> <li>• Zidovudine, also known as AZT or Retrovir</li> <li>• Lamivudine, also known as 3TC or Epivir</li> <li>• Abacavir, also known as Ziagen</li> <li>• Tenofovir, also known as Viread</li> <li>• Emtricitabine, also known as FTC or Emtriva</li> <li>• Lopinavir, also known as Kaletra</li> <li>• Efavirenz, also known as Sustiva</li> <li>• <b>Emtricitabine + tenofovir, also known as Truvada</b></li> <li>• Emtricitabine + tenofovir + efavirenz, also known as Atripla</li> <li>• Not sure/don't know</li> </ul> | 83%              | 0.77                  |
| 4. What is the FDA-approved dosing frequency for the antiretrovirals used for PrEP? <ul style="list-style-type: none"> <li>• Once weekly</li> <li>• <b>Once daily</b></li> <li>• Twice daily</li> <li>• Three times per day</li> <li>• Immediately prior to sexual activity</li> <li>• Immediately following sexual activity</li> <li>• Not sure/don't know</li> </ul>                                                                                                                                                                                                                                                                                               | 86%              | 0.70                  |
| 5. Which of the following is a relative contraindication to prescribing PrEP?                                                                                                                                                                                                                                                                                                                                                                                                                                                                                                                                                                                        | 68%              | 0.57                  |

**Appendix**  
**Factors Related to Pre-exposure Prophylaxis Prescription by U.S. Primary Care Physicians**  
**Walsh and Petroll**

- |                                                                                                                                                                                              |                                                                                                                                                     |     |      |
|----------------------------------------------------------------------------------------------------------------------------------------------------------------------------------------------|-----------------------------------------------------------------------------------------------------------------------------------------------------|-----|------|
| <ul style="list-style-type: none"> <li>• <b>Reduced creatinine clearance (&lt;50 mL/min)</b></li> <li>• Previous myocardial infarction</li> <li>• Hypertension</li> <li>• Obesity</li> </ul> | <ul style="list-style-type: none"> <li>• Squamous cell carcinoma of the skin</li> <li>• None of the above</li> <li>• Not sure/don't know</li> </ul> |     |      |
| 6. How often should individuals be tested for HIV while taking PrEP?                                                                                                                         |                                                                                                                                                     | 62% | 0.55 |
| <ul style="list-style-type: none"> <li>• Weekly</li> <li>• Monthly</li> <li>• <b>Every 2-3 months</b></li> <li>• Every 6 months</li> </ul>                                                   | <ul style="list-style-type: none"> <li>• Annually</li> <li>• Not sure/don't know</li> <li>• Other: _____</li> </ul>                                 |     |      |
| 7. In the U.S., what is the approximate retail cost of the antiretrovirals used for PrEP (without insurance coverage)?                                                                       |                                                                                                                                                     | 37% | 0.42 |
| <ul style="list-style-type: none"> <li>• \$50/month</li> <li>• \$200/month</li> <li>• <b>\$1,200/month</b></li> </ul>                                                                        | <ul style="list-style-type: none"> <li>• \$2,400/month</li> <li>• Not sure/don't know</li> </ul>                                                    |     |      |

---

*Note:* Item descriptive statistics are reported for primary care physicians from 10 U.S. cities (N=280).

<sup>a</sup>If participants chose both component drugs (Tenofovir + Emtricitabine), their answer was also considered correct; only 1 participant chose Tenofovir and Emtricitabine separately but not Emtricitabine + tenofovir.
